# Supplementary material for: Glucose-sensitive poly(ether sulfone) composite membranes blended with phenylboronic acid-based amphiphilic block copolymer for self-regulated insulin release
Source: Royal Society of Chemistry journal article supplement (doi:10.1039/d3tb00687e), 2023-01-01
Supplement: d3tb00687e1.pdf [file d3tb00687e1.pdf]

**Glucose-sensitive poly(ether sulfone) membranes blended  
with phenylboronic acid-based amphiphilic block copolymer  
for self-regulated insulin release**

Jing Liu,<sup>a</sup> Sijia Gao,<sup>\*b</sup> Ying Luo,<sup>a, c</sup> Chunpeng Zhang,<sup>a</sup> Pengliang Zhang,<sup>a</sup> Zilin Wang,<sup>a</sup>  
Lei Zou,<sup>b</sup> Zhuo Zhao<sup>b</sup> and Yongjun Zhang<sup>\*b</sup>

<sup>a</sup> State Key Laboratory of Separation Membranes and Membrane Processes, School of  
Material Science and Engineering, Tiangong University, Tianjin, 300387, China.

<sup>b</sup> State Key Laboratory of Separation Membranes and Membrane Processes, School of  
Chemistry, Tiangong University, Tianjin 300387, China.

<sup>c</sup> Tianjin Key Laboratory of Extracorporeal Life Support for Critical Diseases, Institute  
of Hepatobiliary Disease, Nankai University Affiliated Third Center Hospital, Tianjin,  
300170, China.

E-mail: gaosijia@tiangong.edu.cn E-mail: zhangyj@tiangong.edu.cn

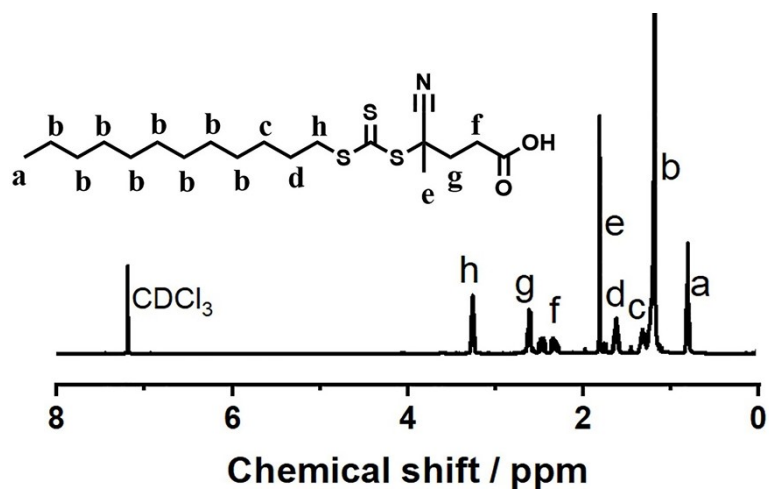

**Fig. S1**  $^1\text{H}$  NMR spectrum of CDTPA with  $\text{CDCl}_3$  as solvent.

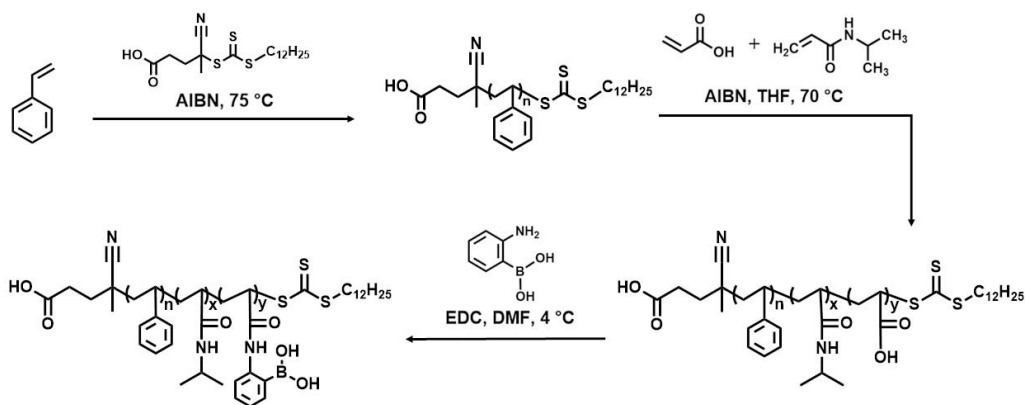

**Fig. S2** Synthetic route to PSNB.

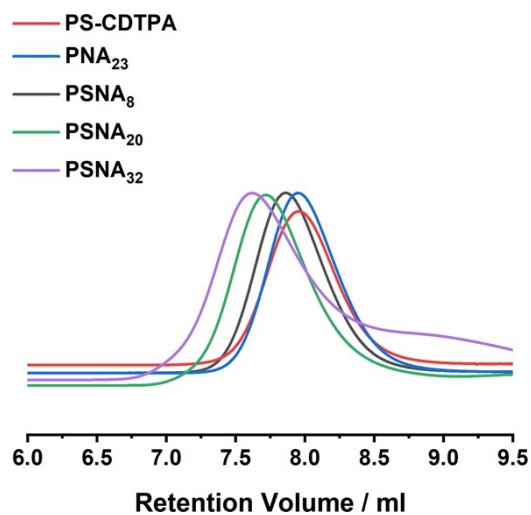

**Fig. S3** GPC analysis of PS-CDTPA, PNA<sub>23</sub>, PSNA<sub>8</sub>, PSNA<sub>20</sub>, PSNA<sub>32</sub>.

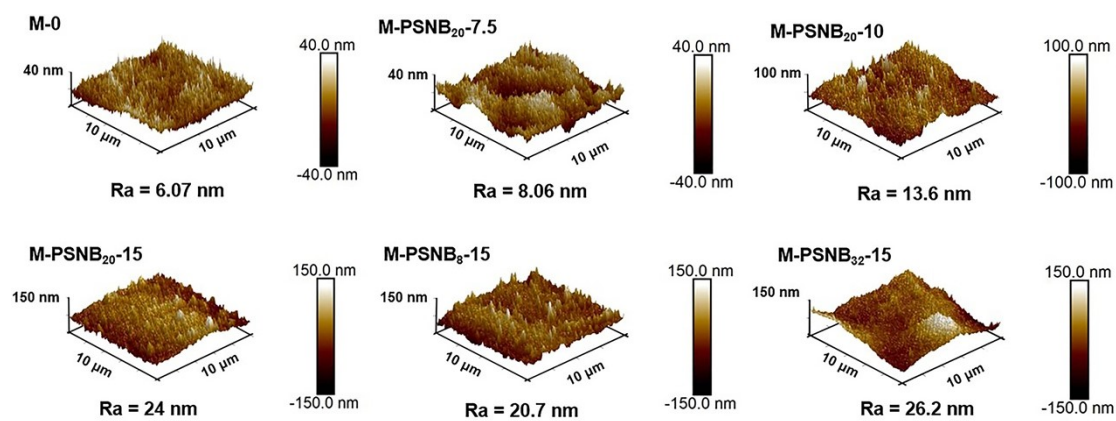

**Fig. S4** Three-dimensional AFM images and Ra value of M-0, M-PSNB<sub>20</sub>-7.5, M-PSNB<sub>20</sub>-10, M-PSNB<sub>20</sub>-15, M-PSNB<sub>8</sub>-15, M-PSNB<sub>32</sub>-15.

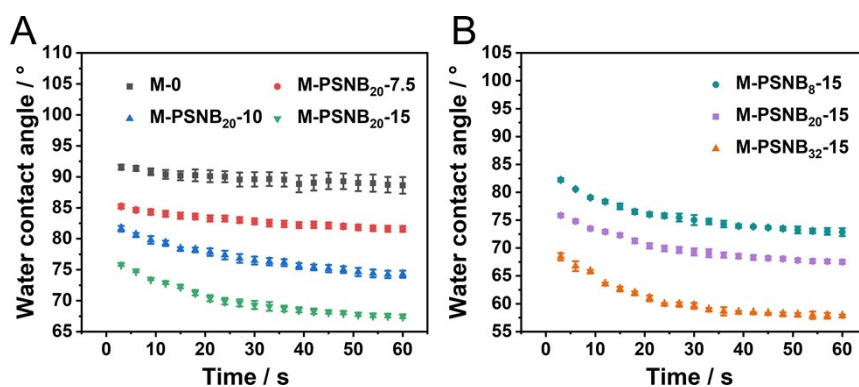

**Fig. S5** (A) The time-dependent water contact angles of M-0, M-PSNB<sub>20</sub>-7.5, M-PSNB<sub>20</sub>-10 and M-PSNB<sub>20</sub>-15. (B) The time-dependent water contact angles of M-PSNB<sub>8</sub>-15, M-PSNB<sub>20</sub>-15 and M-PSNB<sub>32</sub>-15.

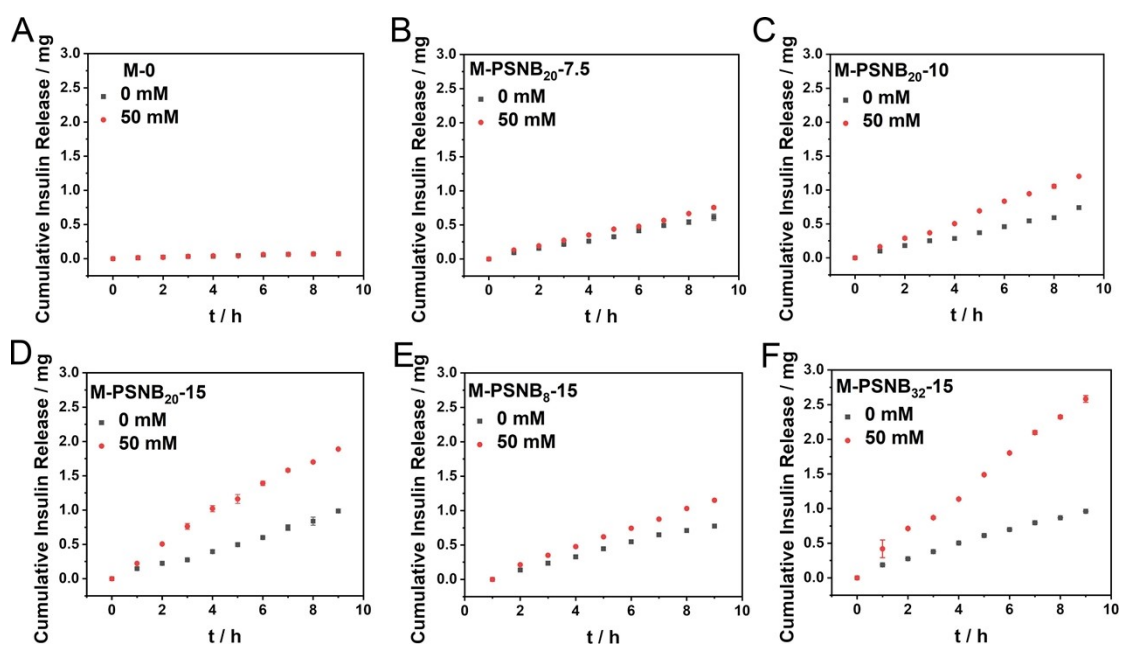

**Fig. S6** The cumulative release of M-0, M-PSNB<sub>20</sub>-7.5, M-PSNB<sub>20</sub>-10, M-PSNB<sub>20</sub>-15, M-PSNB<sub>8</sub>-15, M-PSNB<sub>32</sub>-15 membranes.

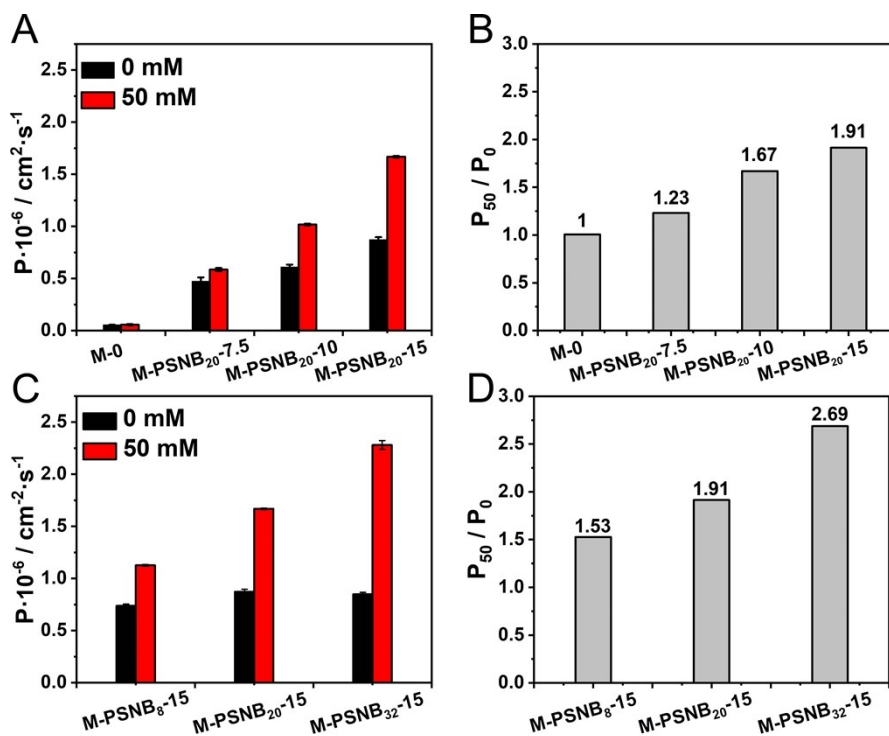

**Fig. S7**  $P$  (A) and  $P_{50}/P_0$  (B) of blend membrane with different polymer additive content at 37 °C.  $P$  (C) and  $P_{50}/P_0$  (D) of blend membrane with different chain length of PNB at 37 °C.

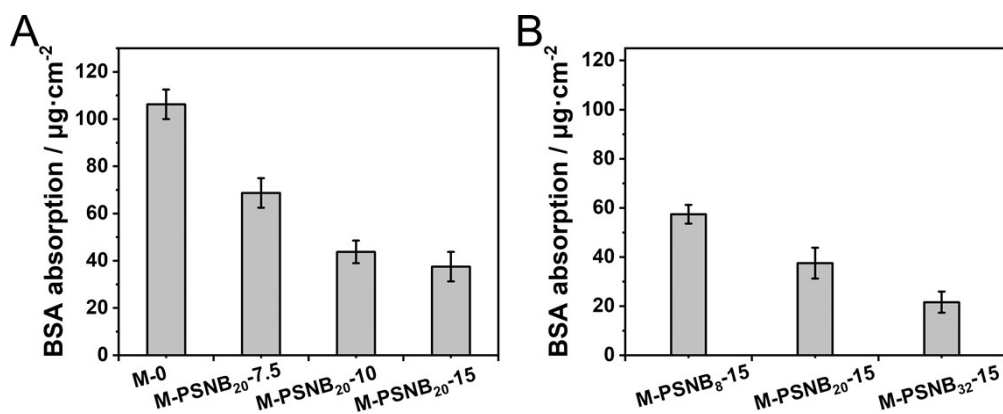

**Fig. S8** BSA adsorption amount of the pure PES membrane and blend membranes.

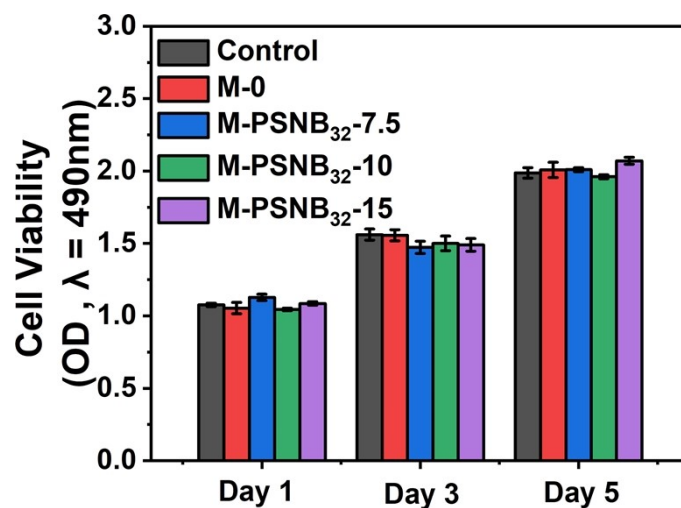

**Fig. S9** Cell viability of L929 cell against M-0, M-PSNB<sub>32</sub>-7.5, M-PSNB<sub>32</sub>-10, M-PSNB<sub>32</sub>-15. Data are shown as mean value  $\pm$  S.D. ( $n = 4$ ). Error bars represent the standard deviation of four replicates.

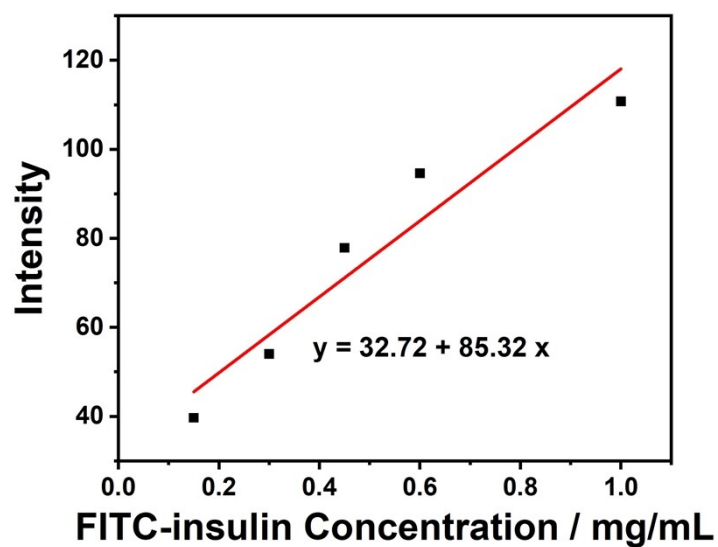

**Fig. S10** Linear relationship between the FITC-insulin concentration and fluorescence intensity ( $E_x = 450$  nm,  $E_m = 581$  nm).
